# Supplementary material for: Highly stable perovskite solar cells with all-inorganic selective contacts from microwave-synthesized oxide nanoparticles
Source: Royal Society of Chemistry journal article supplement (doi:10.1039/c7ta07775k), 2017-01-01
Supplement: c7ta07775k1.pdf [file c7ta07775k1.pdf]

## Supporting Information

# Highly stable perovskite solar cells with all-inorganic selective contacts from microwave-synthesized oxide nanoparticles

Yu-Hsien Chiang,<sup>a</sup> Ching-Kuei Shih,<sup>a</sup> Ang-Syuan Sie,<sup>a</sup> Ming-Hsien Li,<sup>a</sup> Chieh-Chung Peng,<sup>a</sup> Po-Shen Shen,<sup>a</sup> Yu-Po Wang,<sup>a</sup> Tzung-Fang Guo,<sup>a</sup> and Peter Chen<sup>\*a, b, c</sup>

<sup>a</sup> Department of Photonics, National Cheng Kung University, No.1, University Road Tainan 701, Taiwan

<sup>b</sup> Research Center for Energy Technology and Strategy (RCETS), National Cheng Kung University, No.1, University Road, Tainan 701, Taiwan

<sup>c</sup> Center for Micro/Nano Science and Technology, National Cheng Kung University, No.1, University Road, Tainan 701, Taiwan

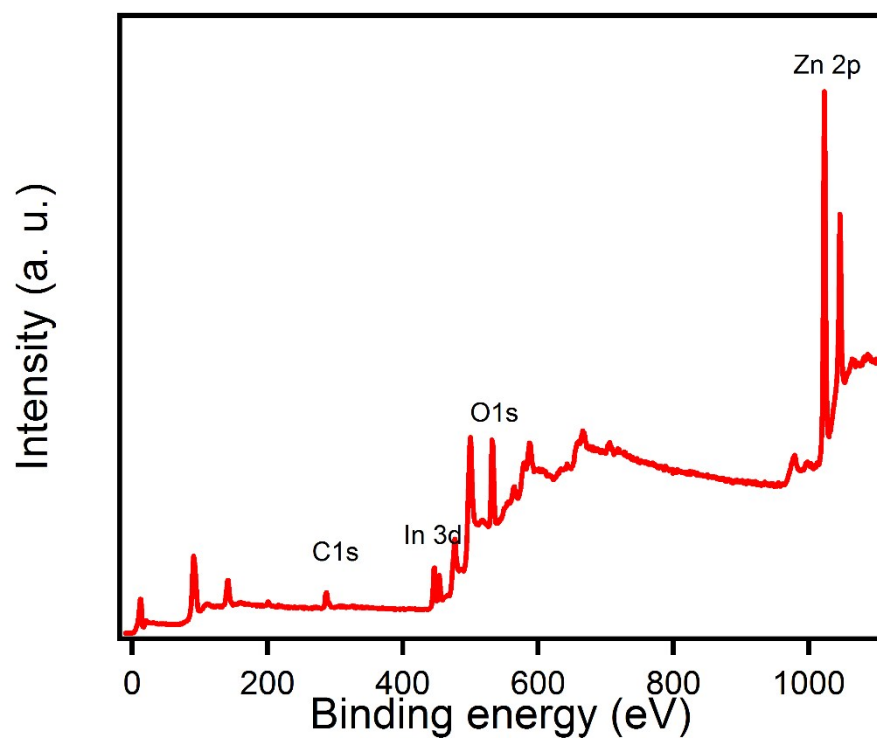

Fig. S1. The X-ray photoemission spectra for 5% IZO powders with full survey scan for binding energy 0-1100 eV.

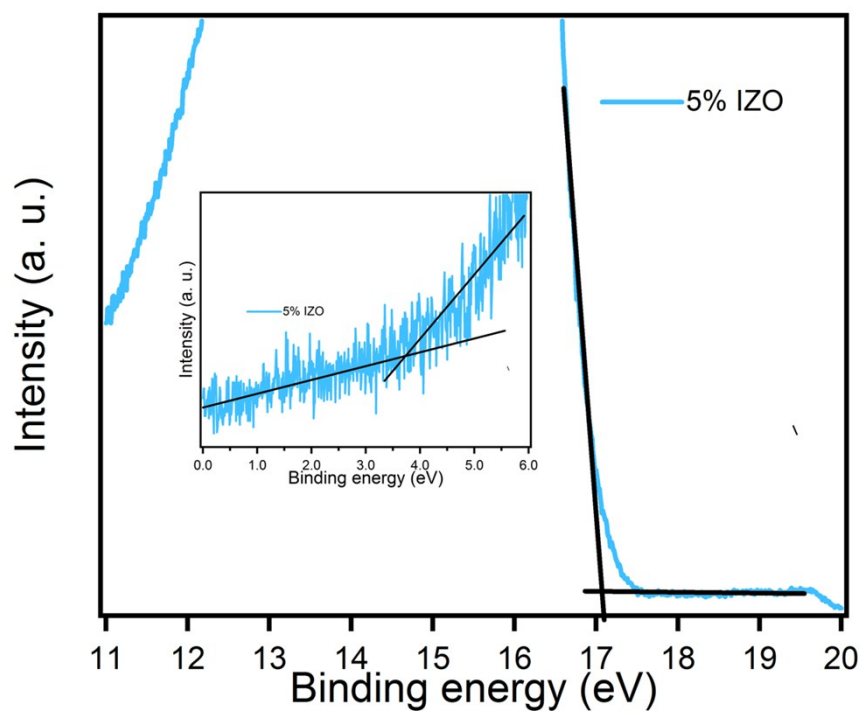

Fig. S2. The ultraviolet photoelectron spectroscopy (UPS) measurement for 5% IZO coated on FTO substrate to measure work function and valence band (inset).

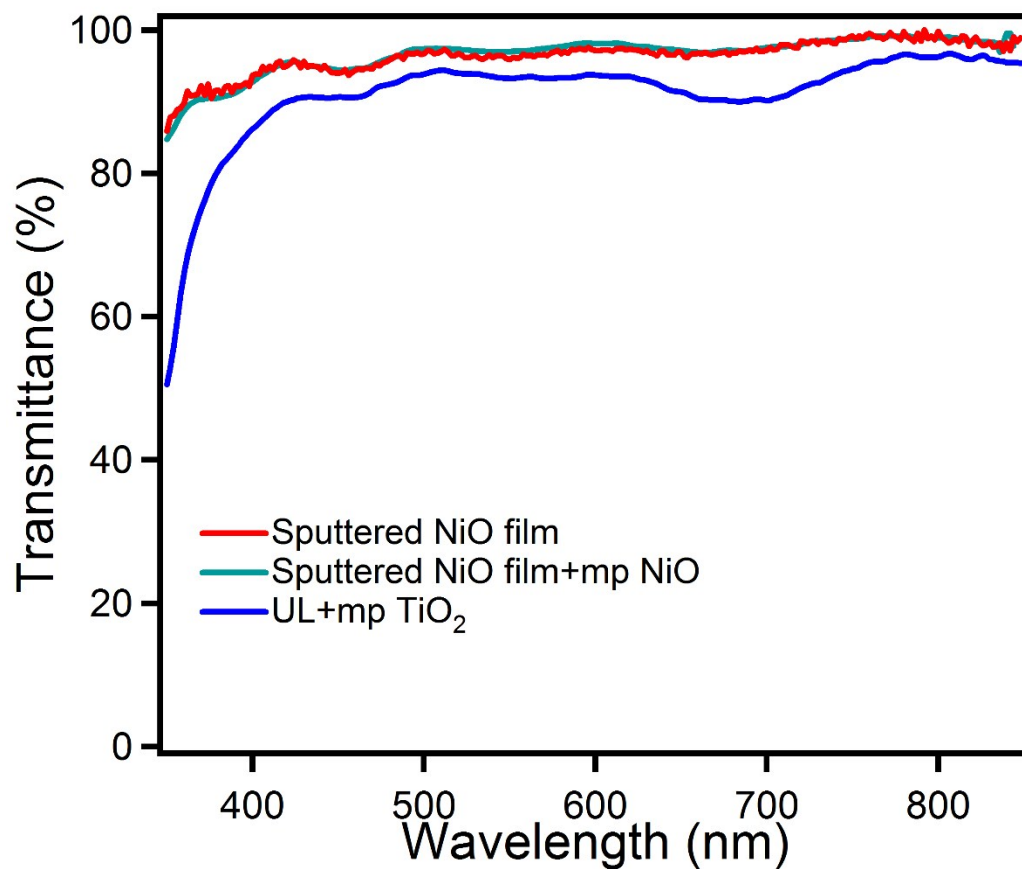

Fig. S3. The transmittance spectra of sputtered NiOx film, sputtered NiOx film + mesoporous NiO layer and mesoporous TiO<sub>2</sub> layer. (We used FTO substrate as baseline.)

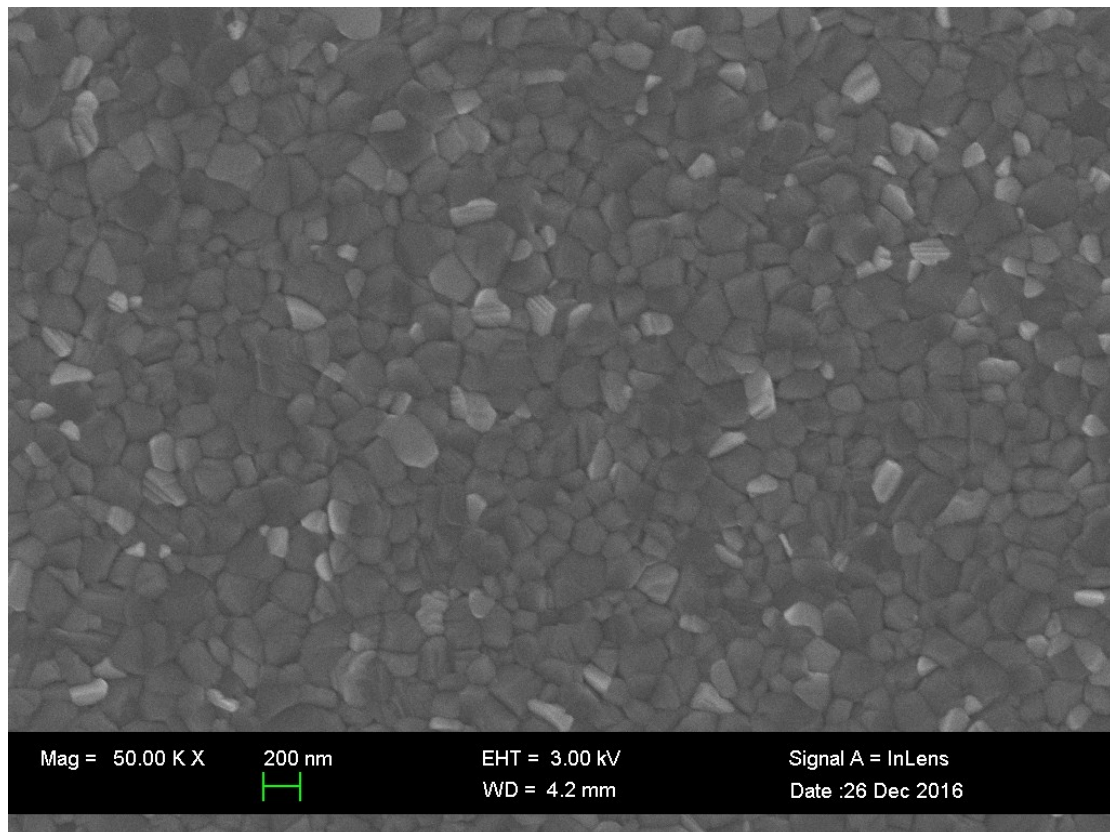

Fig. S4. The top-view SEM image for triple-cation perovskite coated on mesoporous NiO layer/NiO<sub>x</sub> thin.

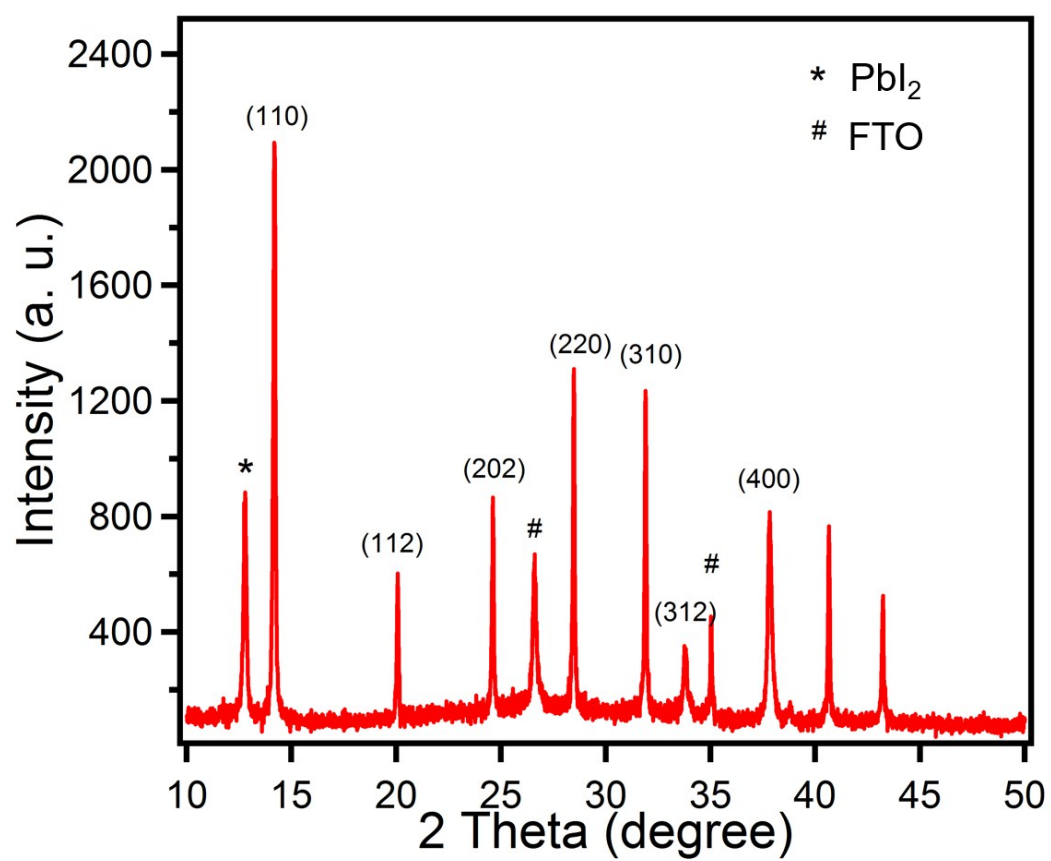

Fig. S5. The XRD pattern of triple-cation perovskite coated on mesoporous NiO layer/ $\text{NiO}_x$  thin.

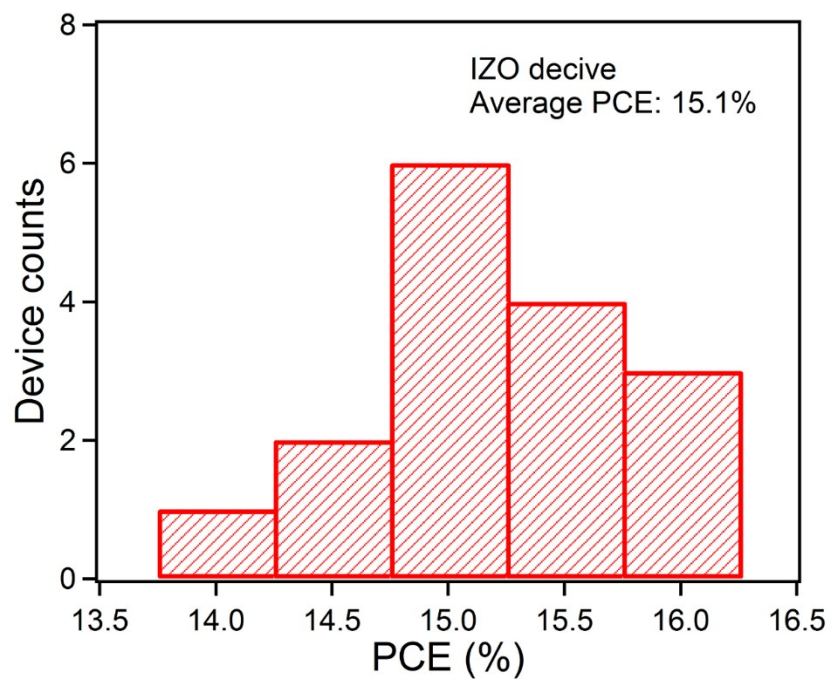

Fig. S6. The statistical data for 6.5 % IZO-based perovskite solar cells.

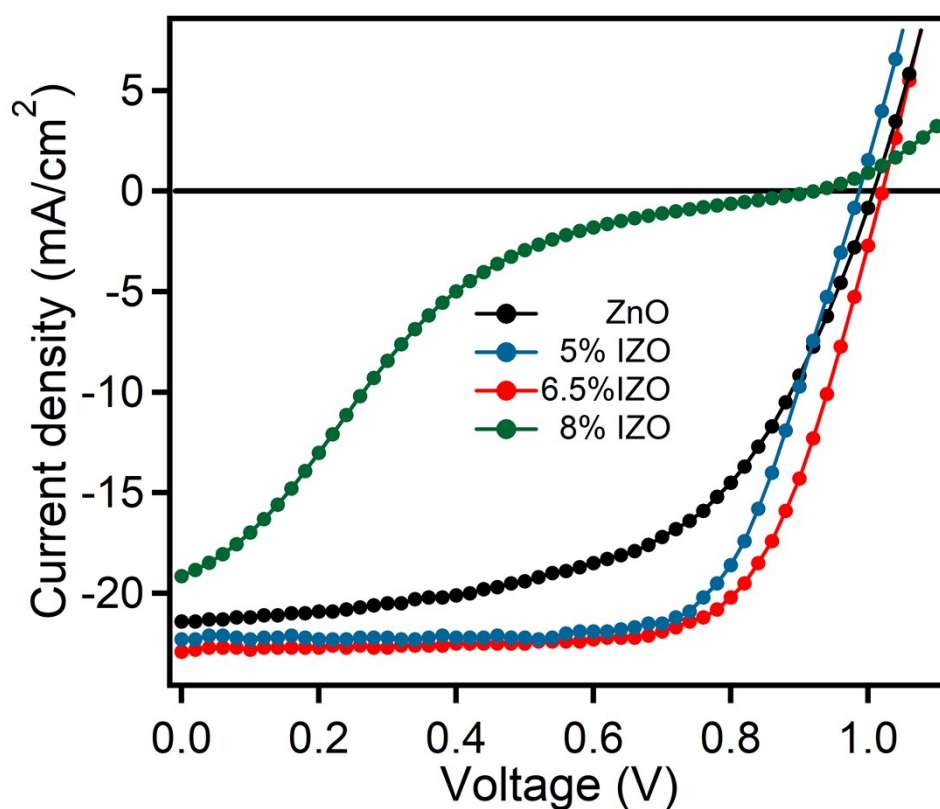

Figure S7. The J-V curve measurement based on different doping ratio of IZO device performance.

Table S1. The summarized *J-V* data for different doping ratio of IZO device performance.

|           | $V_{oc}$<br>(V) | $J_{sc}$<br>(mA/cm <sup>2</sup> ) | FF<br>(%) | PCE<br>(%) |
|-----------|-----------------|-----------------------------------|-----------|------------|
| ZnO       | 1.01            | 21.36                             | 56.25     | 12.01      |
| 5% IZO    | 0.987           | 22.35                             | 69.96     | 15.43      |
| 6.5 % IZO | 1.02            | 22.86                             | 69.43     | 16.20      |
| 8% IZO    | 0.92            | 19.15                             | 15.17     | 2.67%      |

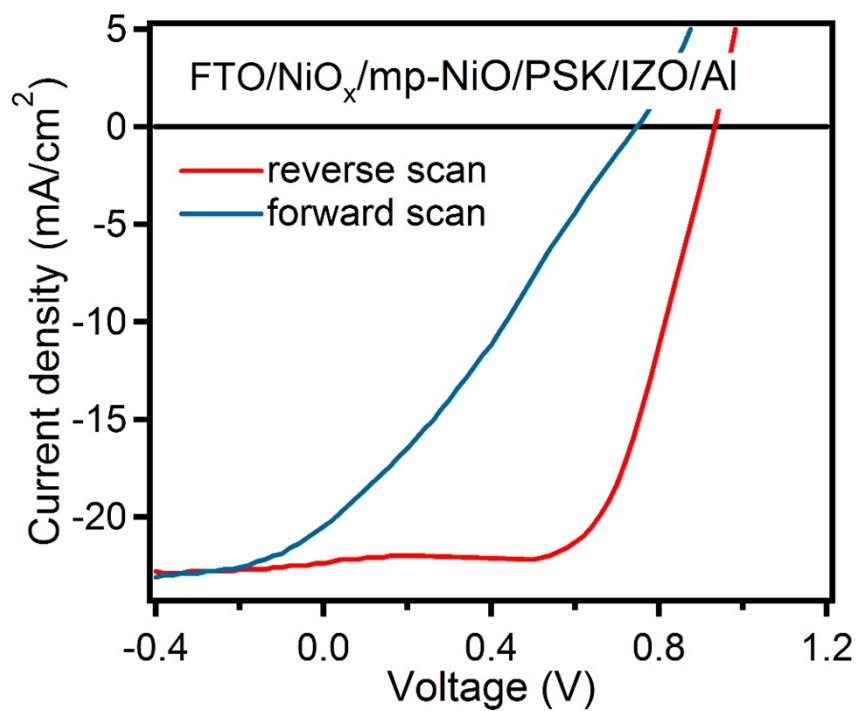

Fig. S8. The hysteresis effect on one of IZO-based perovskite solar cells with  $J$ - $V$  curve for forward scan and reverse scan.

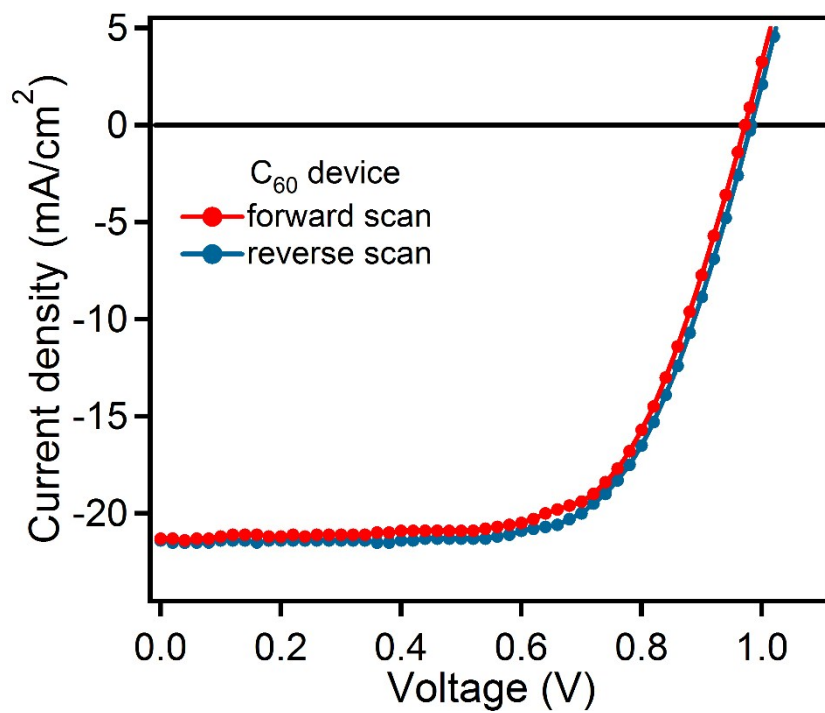

Fig. S9. The  $J$ - $V$  curve for  $\text{C}_{60}$ -based perovskite solar cells with different scan direction from  $J_{\text{sc}}$  to  $V_{\text{oc}}$  (forward scan) and from  $V_{\text{oc}}$  to  $J_{\text{sc}}$  (reverse scan).

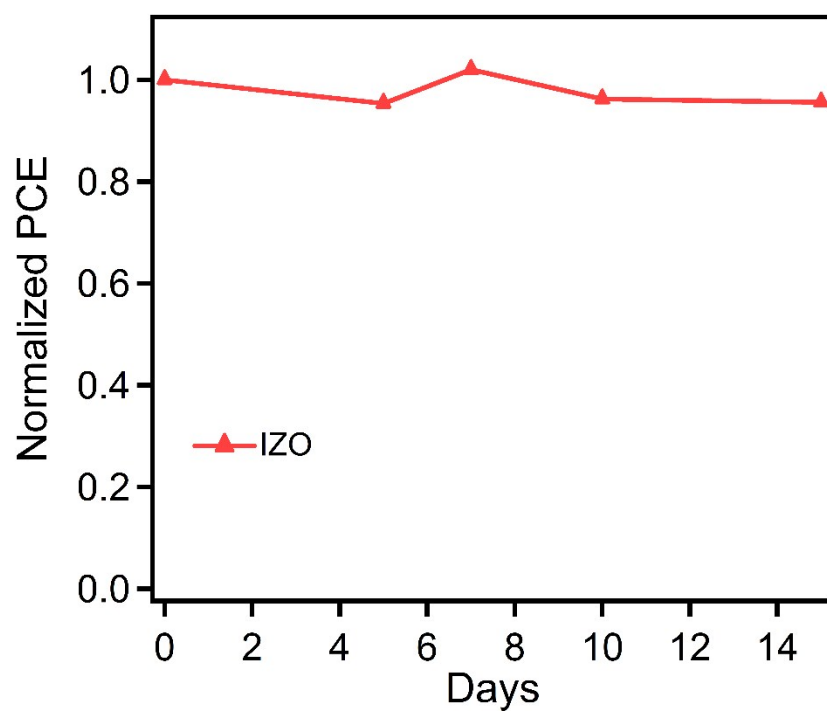

Fig. S10. The stability test with all inorganic interfaces device without encapsulation storage under ambient environment with relative humidity of  $25 \pm 5\%$  for several days.

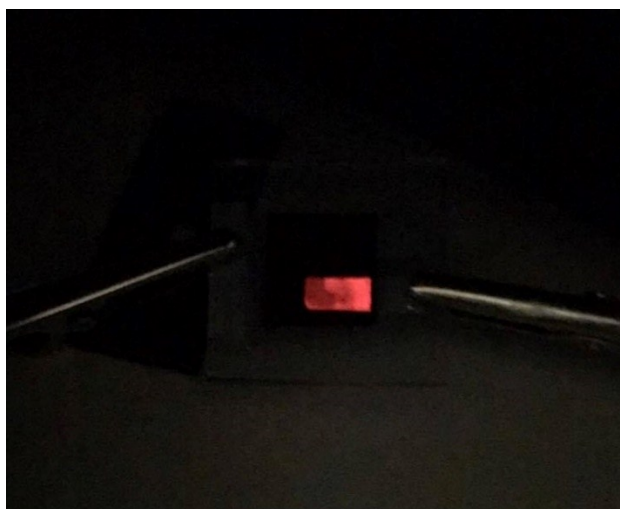

Fig. S11. The electroluminescence photo for IZO-based perovskite solar cell under forward bias in the dark.
